1                   **Title: A COVID-19 antibody curbs SARS-CoV-2 nucleocapsid protein-**  
2                                           **induced complement hyper-activation**

3           **Authors:** Sisi Kang<sup>1†</sup>, Mei Yang<sup>1†</sup>, Suhua He<sup>1†</sup>, Yueming Wang<sup>2,3†</sup>, Xiaoxue Chen<sup>1</sup>, Yao-Qing  
4           Chen<sup>4</sup>, Zhongsi Hong<sup>5</sup>, Jing Liu<sup>6</sup>, Guanmin Jiang<sup>7</sup>, Qiuyue Chen<sup>1</sup>, Ziliang Zhou<sup>1</sup>, Zhechong Zhou<sup>1</sup>,  
5           Zhaoxia Huang<sup>1</sup>, Xi Huang<sup>8</sup>, Huanhuan He<sup>1</sup>, Weihong Zheng<sup>2,3</sup>, Hua-Xin Liao<sup>2,3,\*</sup>, Fei Xiao<sup>1,5,\*</sup>,  
6           Hong Shan<sup>1,9,\*</sup>, Shoudeng Chen<sup>1,10,\*</sup>

7           **Affiliations:**

- 8           1. Molecular Imaging Center, Guangdong Provincial Key Laboratory of Biomedical Imaging,  
9           The Fifth Affiliated Hospital, Sun Yat-sen University, Zhuhai, 519000, China
- 10          2. Institute of Biomedicine, Jinan University, Guangzhou, 510632, China
- 11          3. Zhuhai Trinomab Biotechnology Co., Ltd., Zhuhai, 519040, China
- 12          4. School of Public Health (Shenzhen), Sun Yat-sen University, Shenzhen, China
- 13          5. Department of Infectious Disease, The Fifth Affiliated Hospital, Sun Yat-sen University,  
14          Zhuhai, 519000, China
- 15          6. Department of Respiratory Disease, The Fifth Affiliated Hospital, Sun Yat-sen University,  
16          Zhuhai, 519000, China
- 17          7. Department of Clinical laboratory, The Fifth Affiliated Hospital of Sun Yat-sen University,  
18          Zhuhai, 519000, China
- 19          8. Center for Infection and Immunity, The Fifth Affiliated Hospital, Sun Yat-sen University,  
20          Zhuhai, 519000, China

21 9. Department of Intervention Medicine, The Fifth Affiliated Hospital, Sun Yat-sen University,  
22 Zhuhai, 519000, China

23 10. Department of Experimental Medicine, The Fifth Affiliated Hospital, Sun Yat-sen University,  
24 Zhuhai, 519000, China

25 \* Co-correspondence: Shoudeng Chen (chenshd5@mail.sysu.edu.cn); Hong Shan  
26 (shanhong@mail.sysu.edu.cn); Fei Xiao (xiaof35@mail.sysu.edu.cn); Hua-Xin Liao  
27 (tliao805@jnu.edu.cn)

28 † These authors contributed equally to this work.

29 **One Sentence Summary:** B cell profiling, structural determination, and protease activity assays  
30 identify a functional antibody to N protein.

31 **Abstract:** Although human antibodies elicited by severe acute respiratory distress syndrome  
32 coronavirus-2 (SARS-CoV-2) nucleocapsid (N) protein are profoundly boosted upon infection,  
33 little is known about the function of N-directed antibodies. Herein, we isolated and profiled a panel  
34 of 32 N protein-specific monoclonal antibodies (mAb) from a quick recovery coronavirus disease-  
35 19 (COVID-19) convalescent, who had dominant antibody responses to SARS-CoV-2 N protein  
36 rather than to Spike protein. The complex structure of N protein RNA binding domain with the  
37 highest binding affinity mAb nCoV396 reveals the epitopes and antigen's allosteric changes.  
38 Functionally, a virus-free complement hyper-activation analysis demonstrates that nCoV396  
39 specifically compromises N protein-induced complement hyper-activation, a risk factor for  
40 morbidity and mortality in COVID-19, thus paving the way for functional anti-N mAbs  
41 identification.

42 **Main Text**

43 The fatality rate of the critical condition Coronavirus Disease 2019 (COVID-19) patients is  
44 exceptionally high, at 40% - 49%(1, 2). Acute respiratory failure and generalized coagulopathy  
45 are significant aspects associated with morbidity and mortality(3-5). A subset of severe COVID-  
46 19 patients has distinct clinical features compared to classic acute respiratory distress sndrome  
47 (ARDS), with delayed onset of respiratory distress(6) and relatively well-preserved lung  
48 mechanics despite the severity of hypoxemia(7). It is reported that complement-mediated  
49 thrombotic microvascular injury in the lung may contribute to atypical ARDS features of COVID-  
50 19, accompanied by extensive deposition of the alternative pathway (AP) and lectin pathway (LP)  
51 complement components(8). Indeed, complement activation is found in multiple organs of severe  
52 COVID-19 patients in several other studies(9, 10), as well as in patients with severe acute  
53 respiratory distress sndrome (SARS)(11, 12). A recent retrospective observational study of  
54 11,116 patients revealed that complement disorder associated with morbidity and mortality of  
55 COVID-19(13).

56 Although systemic activation of complement plays a pivotal role in protective immunity against  
57 pathogens, hyper-activation of complement may lead to collateral tissue injury. Severe acute  
58 respiratory distress sndrome-associated coronavirus-2 (SARS-CoV-2) nucleocapsid (N) protein  
59 is a highly immunopathogenic and multifunctional viral protein(14-19), which elicited high titers  
60 of binding antibodies in humoral immune responses(20-22). A recent preprint study found that  
61 SARS-CoV-2 N protein bound to LP complement components MASP-2 (Mannan binding lectin-  
62 associated serine protease-2), and resulted in complement hyper-activation and aggravated  
63 inflammatory lung injury(15). Several studies have reported in isolations of human monoclonal  
64 antibodies (mAbs) targeting SARS-CoV-2 Spike (S) protein, shedding the light of developing

65 therapeutic interventions of COVID-19(20, 23-27). However, little is known about the potential  
66 therapeutic applications of N protein-targeting mAbs in the convalescent B cell repertoire. Herein,  
67 we report a human mAb derived from COVID-19 convalescent, with specific targeting to SARS-  
68 CoV-2 N protein and functionally compromising complement hyper-activation *ex vivo*.

### 69 **Isolation of N protein-directed mAbs**

70 To profile antibody response to SARS-CoV-2 N protein in early recovered patients, we collected  
71 six convalescent blood samples at seven to 25 days after the onset of the disease symptoms. All  
72 patients are recovered from COVID-19 during the outbreak in Zhuhai, Guangdong Province,  
73 China, with age ranging from 23 to 66 years old (**Table S1**). The SARS-CoV-2 nasal swabs reverse  
74 transcription-polymerase chain reaction (RT-PCR) tests were confirmed being negative at the  
75 points of blood collection for all of these six COVID-19 patients. Plasma samples and peripheral  
76 blood mononuclear cells (PBMC) were isolated for serological analysis and antibody isolation.  
77 Serum antibody titers to SARS-CoV-2 S and N proteins were measured by enzyme-linked  
78 immunosorbent assays (ELISA) (**Fig. 1A, B, Table S1**). Serologic analysis demonstrated that  
79 serum antibody titers to the N protein were substantially higher than to the S protein in most of the  
80 patients. For example, ZD004 and ZD006 had only minimal levels of antibody response to the S  
81 protein, while they had much higher antibody titers to the N protein. To be noted, the time from  
82 the disease onset to complete recovery from clinical symptoms of COVID19 patient ZD006 was  
83 only 9 days (**Table S1**).

84 To take advantage of patient ZD006 that was still in the early recovery phase with high possibility  
85 of high percentage of antigen-specific plasma cells, single plasma cells (**Fig. 1C**) with phenotype  
86 of CD3<sup>-</sup>/CD14<sup>-</sup>/CD16<sup>-</sup>/CD235a<sup>-</sup>/CD19<sup>+</sup>/CD20<sup>low-neg</sup>/CD27<sup>hi</sup>/CD38<sup>hi</sup>, as well as antigen-specific  
87 memory B cells with phenotype of CD19<sup>+</sup>/CD27<sup>+</sup> (**Fig. 1D**) were sorted from PBMC of patient

88 ZD006 by fluorescence activating cell sorter (FACS). To ensure an unbiased assessment, the  
89 sorting of antigen-specific memory B cells was carried out with combined probes of both  
90 fluorophore-labeled S and N recombinant proteins. Variable region of immunoglobulin (Ig) heavy-  
91 and light-chain gene segment ( $V_H$  and  $V_L$ ) pairs from the sorted single cells were amplified by RT-  
92 PCR, sequenced, annotated and expressed as recombinant mAbs using the methods as described  
93 previously(28). Recombinant mAbs were screened against SARS-COV-2 S and N proteins. In  
94 total, we identified 32 mAbs reacted with SARS-COV2 N protein including 20 mAbs from plasma  
95 cells, and 12 mAbs from memory B cells (**Table S2**). We found that IgG1 is the predominant  
96 isotype at 46.9% followed by IgG3 (25.0%), IgA (18.8%), IgG2 (6.3%) and IgM (3.1) (**Fig.1E**).  
97  $V_H$  gene family usage in SARs-COV2 N protein-reactive antibodies was 18.8%  $V_{H1}$ , 62.5%  $V_{H3}$ ,  
98 9.4%  $V_{H4}$ , 6.2%  $V_{H5}$  and 3.1%  $V_{H7}$ , respectively (**Fig. 1F**), which was similar to the distribution  
99 of  $V_H$  families collected in the NCBI database. Nine of 32 SARS-COV-2 N protein-reactive  
100 antibodies had no mutation from their germline  $V_H$  and  $V_H$  gene segments (**Fig. 1F, Table S2**).  
101 Average mutation frequency of the remaining mutated antibodies was 5.3 % (+/-3.6%) in  $V_H$  and  
102 3.5% (+/-2.7%) in  $V_L$ .

103 In consistent with the lower serum antibody titers to SARS-COV-2 S protein, we identified only  
104 eight SARS-COV-2 S protein-reactive mAbs including 5 antibodies from plasma cells and three  
105 antibodies from memory B cells.  $V_H$  gene segment of the S protein-reactive antibodies had either  
106 no mutation (6/8) or minimal mutation (1/300) (**Fig.1G**). There were no significant differences in  
107 complementarity-determining region 3 (CDR3) length in amino acid residues between the N-  
108 (**Fig.1H**) and S-reactive antibodies (**Fig.1I**).

109 Approximately a quarter portion of antibodies directed to the N protein (**Fig.1F**) and almost all of  
110 antibodies to the S protein that had no mutation or minimal mutations from their germlines (**Fig.1G**)

111 reflected as primary antibody response similar to other typical primary viral infections. However,  
112 relatively high  $V_H$  mutation frequencies (mean of 5.7%) of the majority antibodies to the N proteins  
113 were more similar to mutation frequencies of antibodies from the secondary responses to influenza  
114 vaccination reported previously. Although patient ZD006 was hospitalized for only nine days after  
115 the first appearance of COVID-19 symptoms, the patient has high serum antibody titers and the  
116 majority of the isolated N-reactive antibodies have high mutation frequency, whereas the S-  
117 directed antibodies have no mutation or minimal mutation. These results reflect much stronger  
118 antigen stimulation to the host driven by SARS-COV2 N protein than by the S protein.

### 119 **Binding characterizations of anti-N mAbs**

120 To determine the antigenic targets by the N-reactive antibodies, we next analyzed the binding  
121 activities by ELISA with variant constructs of the N protein (N-FL: 1-419; N-NTD: 41-174; N-  
122 CTD: 250-364) (**Fig. 2A**). Among 32 mAbs binding to NFL; 13 antibodies bound to N-NTD; one  
123 antibody bound to N-CTD (**Fig. 2B**). Total of nine antibodies including one antibody (nCoV400)  
124 recognizing N-CTD, seven mAbs binding N-NTD (nCoV396, nCoV416, nCoV424, nCoV425,  
125 nCoV433, nCoV454, nCoV457) and one mAb (nCoV402) binding only to NFL but not to the other  
126 variant N proteins were chosen as representatives for further study. Purified antibodies were  
127 confirmed to bind the NFL protein by ELISA (**Fig. 2C**). Affinity of these antibodies to the NFL  
128 protein was measured by surface plasmon resonance (SPR) (**Fig. 2D**). In an effort to further  
129 characterize the function and structure relationship, three antibodies nCoV396, nCoV416 and  
130 nCoV457 were selected for production of recombinant Fab antibodies based on their unique  
131 characters. MAb nCoV396 has  $V_H$  mutation frequency of 2.8%, but high binding affinity with KD  
132 of 1.02 nM (**Fig. 2D**) to the N protein. MAbs nCoV416 and nCoV457 have high  $V_H$  mutation at

133 11.1% and 8.7%, respectively, and have binding affinity to N protein with KD of 7.26 nM and  
134 12.6 nM (**Fig.2D, Table S3**).

### 135 **Complex structure of mAb with N-NTD**

136 To investigate the molecular interaction mechanism of mAb nCoV396 with N protein, we next  
137 solved the complex structure of SARS-CoV-2 N protein NTD (N-NTD) with nCoV396 Fab  
138 fragments (nCoV396Fab) at 2.1 Å resolution by X-ray crystallography. The final structure is fitted  
139 with visible electron density spanning residues 49-173 (SARS-CoV-2 N-NTD), 1-220  
140 (nCoV396Fab, the heavy chain of Fab fragments), and 1-213 (nCoV396Fab, the light chain of Fab  
141 fragments, except residues ranged 136-141), respectively. The complete statistics for data  
142 collection, phasing, and refinement are presented in **Table S4**.

143 With the help of the high-resolution structure, we were able to designate all complementarity  
144 determining regions (CDRs) in the nCoV396Fab as L-CDR1 (light chain CDR1, residues 23-32),  
145 L-CDR2 (light chain CDR2, residues 51-54), L-CDR3 (light chain CDR3, residues 94-100), H-  
146 CDR1 (heavy chain CDR1, residues 26-33), H-CDR2 (heavy chain CDR2, residues 51-57), and  
147 H-CDR3 (heavy chain CDR3, residues 99-108). Among them, we identified the interaction  
148 interface between N-NTD and L-CDR1, L-CDR3, H-CDR1, H-CDR2, H-CDR3 of nCoV396Fab  
149 with unambiguous electron density map (**Fig. 3A, Fig. S1A**).

150 The interacting CDRs pinch the C-terminal tail of SARS-CoV-2 N-NTD (residues range from 159  
151 to 172), with extensive binding contacts of 1079 Å<sup>2</sup> burying surface area (**Table S5**). Light chain  
152 L-CDR1 and L-CDR3 of nCoV396Fab interact with residues ranging from 159-163 of N-NTD via  
153 numerous hydrophilic and hydrophobic contacts (**Fig. 3B, Fig. S1B**). Of note, SARS-CoV-2 N-  
154 NTD residue Q163 is recognized by L-CDR3 residue T95 via a hydrogen bond, simultaneously  
155 stacking with L-CDR3 residue W96 and L-CDR1 residue Y31 (**Fig. 3C**). Besides, a network of

156 interactions from heavy chain H-CDR2, H-CDR3 of nCoV396Fab to residues 165-172 of N-NTD  
157 suggests that SARS-CoV-2 N-NTD conservative residue K169 has a critical role in nCoV396  
158 antibody binding. The K169 is recognized via hydrogen bonds with residues E99  $\delta$ -carboxyl group  
159 and T100, D102, S105 main-chain carbonyl groups inside the H-CDR3 of nCoV396Fab (**Fig. 3D**).  
160 Besides, SARS-CoV-2 N-NTD L167 also interacts with I33, V50, N57, and A59 of H-CDR1 and  
161 H-CDR2 of nCoV396Fab through hydrophobic interactions (**Fig. 3E**). Interestingly, all three  
162 residues (Q163, L167, and K169) of SARS-CoV-2 N-NTD are relatively conserved in the highly  
163 pathogenic betacoronavirus N protein (**Fig. S2B**), which implicated that the nCoV396 may cross-  
164 interact with SARS-CoV N protein or MERS-CoV N protein. Indeed, the binding affinities  
165 measured by SPR analysis demonstrate that nCoV396 interacts to SARS-CoV N protein and  
166 MERS-CoV N protein with KD of 7.4 nM (**Fig. S2B, C**).

167 To discover the conformational changes between the SARS-CoV-2 N-NTD apo-state with the  
168 antibody-bound state, we next superimposed the complex structure with the N-NTD structure  
169 (PDB:6M3M)(17). The superimposition result suggests that the C-terminal tail of SARS-CoV-2  
170 N-NTD unfold from the basic palm region upon the nCoV396Fab binding (**Fig. 3F**), which likely  
171 contributes to allosteric regulation of normal full-length N protein's function. Additionally,  
172 nCoV396Fab binding results in a 7.4 Å movement of the  $\beta$ -finger region outward from the RNA  
173 binding pocket, which may enlarge the RNA binding pocket of the N protein (**Fig. 3F**).

174 To sum up, our crystal structural data demonstrated that the human mAb nCoV396 recognizes the  
175 SARS-CoV-2 N protein via a pinching model, resulting in a dramatic conformational change of  
176 residues ranged from 159 to 172, which is the linker region of N-NTD connected with other  
177 domains.

178 **MAb curbs N-induced complement activation**



179 Although a recent study suggests that complement cascade is hyperactive by N protein in lungs of  
180 COVID-19 patients *via* lectin pathway(15), it is unclear how to develop a virus-free and effective  
181 system for analyzing the role of SARS-CoV-2 N protein on complement hyper-activation. To this  
182 end, we developed a clinical autoimmune disease serum-based protease enzymatic approach to  
183 assess complement activation level in the presence of SARS-CoV-2 N protein. Since complement  
184 activation initiated by lectin pathway is featured with MASP-2 proteases by specific activity for  
185 cleaving complement component 2 and 4 (C2 and C4)(29), we designed a complement component  
186 2 (C2) internal quenched fluorescent peptide-based analysis route for *ex vivo* complement hyper-  
187 activation (**Fig. 4A**). Briefly, serum was collected from peripheral blood of the volunteers with  
188 autoimmune disease, which contains necessary components for complement activations  
189 characterized by elevated levels of C3 value (**Table S6**). Next, we collected the fluorescence signal  
190 from cleaved C2 synthetic peptide substrates (2Abz-SLGRKIQI-Lys(Dnp)-NH<sub>2</sub>) in reaction  
191 mixtures containing autoimmune disease serum, via in the absence or presence of SARS-CoV-2  
192 N protein with or without mAb nCoV396. The initial reaction rate ( $v_0$ ) was estimated at a single  
193 concentration of individual sera from duplicate measurements over a range of substrate  
194 concentrations. The steady-state reaction constants  $V_{\max}$  (maximal velocity) and  $K_m$  (Michaelis  
195 constant) were determined for comparisons (**Fig. 4A**).

196 As shown in **Fig. 4B**, the calculated  $V_{\max}$  of reactions without any other exogenous proteins is 1.49  
197 RU·s<sup>-1</sup>. Additions of SARS-CoV-2 N protein (concentrations ranged 0.5 μM to 10 μM) in the  
198 reactions remarkably elevate the  $V_{\max}$  up to 2 folds, ranged from 2.37 ~ 3.02 RU·s<sup>-1</sup>. Similarly,  
199 additions of SARS-CoV-2 N protein lead to approximate 1.8 folds increasing of the  $V_{\max}/K_m$  values,  
200 which suggested that the specificity constant ( $K_{\text{cat}}/K_m$ ) of MASP-2 to substrates is increased in the  
201 presence of viral N protein as the enzyme concentrations are equivalent among the reactions

202 (Table S7 - S8). To confirm the kinetic analyses, Hanes plots ( $[S]/V$  versus  $[S]$ ) were also drawn  
203 and found to be linear (Fig. 4C). Therefore, the additions of SARS-CoV-2 N protein do not change  
204 the single substrate binding site characterization of the enzymatic reactions. To assess the  
205 suppression ability of nCoV396 to the SARS-CoV-2 N protein-induced complement hyper-  
206 activation function, we next conducted the complement hyper-activation analysis in serial N  
207 protein: nCoV396 ratios. As shown in Fig. 4D, the addition of N protein elevates  $V_{\max}$  value up to  
208 40-folds (1:0 ratio), whereas the additions of antibody nCoV396 decline the  $V_{\max}$  in a dose-  
209 depended manner (Table S9). To further validate the function of nCoV396, we next perform  
210 complement hyper-activation analysis in other five serum samples from autoimmune disease  
211 donors. Consistently, the  $V_{\max}$  of reactions are boosted in the presence of N protein in all samples,  
212 while declined in the presence of mAb nCoV396 together with N protein (Fig. 4E). In conclusion,  
213 these results demonstrate that SARS-CoV-2 N protein is capable of inducing the complement  
214 hyper-activations *ex vivo*, not only by facilitating the maximal velocity of MASP-2 catalytic  
215 activity, but also enhancing the substrate binding specificity in the reactions. The N-directed mAb  
216 nCoV396 specifically compromises the SARS-CoV-2 N protein-induced complement hyper-  
217 activation within clinical serum samples.

## 218 Discussion

219 From a quickly recovered COVID-19 patient, we isolated 32 mAbs specifically targeting to SARS-  
220 CoV-2 N protein. The binding affinity of mAbs ranged from 1 nM to 25 nM, comparable with  
221 mature spike protein-directed antibodies(20, 23-27) and the other mature antibodies identified  
222 during acute infections(30, 31). Characteristics of the isolated N-reactive mAbs are different from  
223 the isolated S-reactive mAbs in the early recovery COVID-19 patients suggested that sampling

224 time is pivotal for identifying differential immune responses to different SARS-CoV-2 viral  
225 proteins.

226 The crystal structure of nCoV396 bound to SARS-CoV-2 N-NTD elucidates the interaction  
227 mechanism of the complex between the first reported N protein-directed human mAb and its  
228 targeted N protein. Three conservative amino acids (Q163, L167, K169) in N protein are  
229 responsible for nCoV396 recognition, which provided a clue of cross-reactivity to SARS-CoV or  
230 MERS-CoV N protein for nCoV396. Intriguingly, the nCoV396 binding of SARS-CoV-2 N-NTD  
231 undergoes several conformational changes, resulting in a change in N-NTD RNA binding pocket  
232 enlargement and partial unfolding of basic palm region. More importantly, this conformational  
233 change occurs in the C-terminal tail of the N-NTD, which may alter the positioning of individual  
234 domains in context of full-length protein and lead to a potential allosteric effect for protein  
235 functions.

236 Complement is one of the first lines of defense in innate immunity and is essential for cellular  
237 integrity, tissue homeostasis, and modifying the adaptive immune response(32). Emerging  
238 evidence suggests that the complement system plays a vital role in a subset of COVID-19 critical  
239 patients, with features of atypical acute respiratory distress syndrome, disseminated intravascular  
240 coagulation, and multiple organs failure(9, 10, 33). A few pieces of evidence show that highly  
241 pathogenic coronavirus (i.e., SARS-CoV-2 and SARS-CoV) N protein is involved in the initiated  
242 MASP-2 dependent complement activation(15, 34). Encouragingly, COVID-19 critical patients  
243 treated with complement inhibitors, including small molecules to complement component C3  
244 (AMY-101) and antibody targeting to complement component C5 (Eculizumab), show remarkable  
245 therapeutic outcomes(15). Currently, there are 11 clinical trials relative to targeting the  
246 complement pathway (<https://clinicaltrials.gov>). In order to avoid adverse effects of human

247 complement component targeting therapy, a viral protein-specific approach is warranted. The  
248 antibody nCoV396 isolated from COVID-19 convalescents is an excellent potential candidate with  
249 high binding affinity to N protein and high potency to inhibit the complement hyper-activation. As  
250 revealed by atomic structural information, the binding may allosterically change the full-length N  
251 protein conformation. To determine the role of nCoV396 in the suppression of complement hyper-  
252 activation, we monitor the MASP-2 protease activity based on its specific fluorescent quenched  
253 C2 substrate in serums from autoimmune disease patients. The complete complement components  
254 in sera of patients with autoimmune disorders allow us to monitor the activating effects of SARS-  
255 CoV-2 N protein and its specific mAbs. Although we cannot calculate the other steady-state  
256 enzymatic reaction constants as the precisely concentration of MASP-2 in serum is unknown, we  
257 identified the  $V_{\max}$  of the specific C2 substrate for the enzymatic reaction. We demonstrated that  
258 SARS-CoV-2 N protein elevated the  $V_{\max}$  of the reaction, up to 40 folds, in serum of all 7  
259 individuals tested, while nCoV396 effectively suppress  $V_{\max}$  of the reaction mixture. These results  
260 indicated that the autoimmune disease patient serum-based complement activation analysis is a  
261 virus-free and effective method for examining complement activation mediated by coronavirus N  
262 protein.

263 Although precise interaction of SARS-CoV-2 N protein with MASP-2 remains to be elucidated,  
264 our work defined the region on the SARS-CoV-2 N protein recognized by mAb nCoV396 that  
265 plays an important role on complement hyper-activation, and indicates that human mAbs from the  
266 convalescents could be a promising potential therapeutic candidate for the treatment of COVID-  
267 19.

268

269  
270  
271  
272  
273  
274  
275  
276  
277  
278  
279  
280  
281  
282  
283  
284  
285  
286  
287  
288  
289  
290  
291

**References:**

1. Z.H. Liu, X. B. Xue, Z. Z. Epidemiology Working Group for Ncip Epidemic Response, Chinese Center for Disease Control and Prevention. [The epidemiological characteristics of an outbreak of 2019 novel coronavirus diseases (COVID-19) in China]. **41**, 145-151 (2020).
2. W. J. Wiersinga, A. Rhodes, A. C. Cheng, S. J. Peacock, H. C. Prescott, Pathophysiology, Transmission, Diagnosis, and Treatment of Coronavirus Disease 2019 (COVID-19): A Review. *Jama-J. Am. Med. Assoc.* (2020).
3. N. Tang, D. J. Li, X. Wang, Z. Y. Sun, Abnormal coagulation parameters are associated with poor prognosis in patients with novel coronavirus pneumonia. *J. Thromb. Haemost.* **18**, 844-847 (2020).
4. D. W. Wang, B. Hu, C. Hu, F. F. Zhu, X. Liu, J. Zhang, B. B. Wang, H. Xiang, Z. S. Cheng, Y. Xiong, Y. Zhao, Y. R. Li, X. H. Wang, Z. Y. Peng, Clinical Characteristics of 138 Hospitalized Patients With 2019 Novel Coronavirus-Infected Pneumonia in Wuhan, China. *Jama-J. Am. Med. Assoc.* **323**, 1061-1069 (2020).
5. N. Zhu, D. Zhang, W. Wang, X. Li, B. Yang, J. Song, X. Zhao, B. Huang, W. Shi, R. Lu, P. Niu, F. Zhan, X. Ma, D. Wang, W. Xu, G. Wu, G. F. Gao, W. Tan, I. China Novel Coronavirus, T. Research, A Novel Coronavirus from Patients with Pneumonia in China, 2019. *N. Engl. J. Med.* **382**, 727-733 (2020).
6. F. Zhou, T. Yu, R. Du, G. Fan, Y. Liu, Z. Liu, J. Xiang, Y. Wang, B. Song, X. Gu, L. Guan, Y. Wei, H. Li, X. Wu, J. Xu, S. Tu, Y. Zhang, H. Chen, B. Cao, Clinical course and risk factors for mortality of adult inpatients with COVID-19 in Wuhan, China: a retrospective cohort study. *Lancet* **395**, 1054-1062 (2020).

- 292 7. L. Gattinoni, S. Coppola, M. Cressoni, M. Busana, S. Rossi, D. Chiumello, COVID-19  
293 Does Not Lead to a "Typical" Acute Respiratory Distress Syndrome. *Am. J. Respir. Crit.*  
294 *Care Med.* **201**, 1299-1300 (2020).
- 295 8. C. Magro, J. J. Mulvey, D. Berlin, G. Nuovo, S. Salvatore, J. Harp, A. Baxter-Stoltzfus, J.  
296 Laurence, Complement associated microvascular injury and thrombosis in the  
297 pathogenesis of severe COVID-19 infection: A report of five cases. *Transl. Res.* **220**, 1-13  
298 (2020).
- 299 9. M. Cugno, P. L. Meroni, R. Gualtierotti, S. Griffini, E. Grovetti, A. Torri, M. Panigada, S.  
300 Aliberti, F. Blasi, F. Tedesco, F. Peyvandi, Complement activation in patients with  
301 COVID-19: A novel therapeutic target. *J. Allergy Clin. Immunol.* **146**, 215-217 (2020).
- 302 10. M. Noris, A. Benigni, G. Remuzzi, The case of complement activation in COVID-19  
303 multiorgan impact. *Kidney Int.* **98**, 314-322 (2020).
- 304 11. R. T. Pang, T. C. Poon, K. C. Chan, N. L. Lee, R. W. Chiu, Y. K. Tong, R. M. Wong, S.  
305 S. Chim, S. M. Ngai, J. J. Sung, Y. M. Lo, Serum proteomic fingerprints of adult patients  
306 with severe acute respiratory syndrome. *Clin. Chem.* **52**, 421-429 (2006).
- 307 12. J. H. Chen, Y. W. Chang, C. W. Yao, T. S. Chiueh, S. C. Huang, K. Y. Chien, A. Chen, F.  
308 Y. Chang, C. H. Wong, Y. J. Chen, Plasma proteome of severe acute respiratory syndrome  
309 analyzed by two-dimensional gel electrophoresis and mass spectrometry. *Proc. Natl. Acad.*  
310 *Sci. U. S. A.* **101**, 17039-17044 (2004).
- 311 13. V. Ramlall, P. M. Thangaraj, C. Meydan, J. Foux, D. Butler, J. Kim, B. May, J. K. De  
312 Freitas, B. S. Glicksberg, C. E. Mason, N. P. Tatonetti, S. D. Shapira, Immune complement  
313 and coagulation dysfunction in adverse outcomes of SARS-CoV-2 infection. *Nat. Med.*  
314 (2020).

- 315 14. R. McBride, M. van Zyl, B. C. Fielding, The coronavirus nucleocapsid is a multifunctional  
316 protein. *Viruses* **6**, 2991-3018 (2014).
- 317 15. T. Gao, M. Hu, X. Zhang, H. Li, L. Zhu, H. Liu, Q. Dong, Z. Zhang, Z. Wang, Y. Hu, Y.  
318 Fu, Y. Jin, K. Li, S. Zhao, Y. Xiao, S. Luo, L. Li, L. Zhao, J. Liu, H. Zhao, Y. Liu, W.  
319 Yang, J. Peng, X. Chen, P. Li, Y. Liu, Y. Xie, J. Song, L. Zhang, Q. Ma, X. Bian, W. Chen,  
320 X. Liu, Q. Mao, C. Cao,  
321 <https://www.medrxiv.org/content/10.1101/2020.03.29.20041962v3>. (2020).
- 322 16. Y. R. Guo, Q. D. Cao, Z. S. Hong, Y. Y. Tan, S. D. Chen, H. J. Jin, K. S. Tan, D. Y. Wang,  
323 Y. Yan, The origin, transmission and clinical therapies on coronavirus disease 2019  
324 (COVID-19) outbreak - an update on the status. *Military Med. Res.* **7**, 11 (2020).
- 325 17. S. Kang, M. Yang, Z. Hong, L. Zhang, Z. Huang, X. Chen, S. He, Z. Zhou, Z. Zhou, Q.  
326 Chen, Y. Yan, C. Zhang, H. Shan, S. Chen, Crystal structure of SARS-CoV-2 nucleocapsid  
327 protein RNA binding domain reveals potential unique drug targeting sites. *Acta Pharm.*  
328 *Sin. B*, **10** (7), 1228-1238 (2020).
- 329 18. J. Y. Li, C. H. Liao, Q. Wang, Y. J. Tan, R. Luo, Y. Qiu, X. Y. Ge, The ORF6, ORF8 and  
330 nucleocapsid proteins of SARS-CoV-2 inhibit type I interferon signaling pathway. *Virus*  
331 *Res.* **286**, 198074 (2020).
- 332 19. Q. Ye, A. M. V. West, S. Silletti, K. D. Corbett, Architecture and self-assembly of the  
333 SARS-CoV-2 nucleocapsid protein. *Protein Sci.* (2020).
- 334 20. X. Chi, R. Yan, J. Zhang, G. Zhang, Y. Zhang, M. Hao, Z. Zhang, P. Fan, Y. Dong, Y.  
335 Yang, Z. Chen, Y. Guo, J. Zhang, Y. Li, X. Song, Y. Chen, L. Xia, L. Fu, L. Hou, J. Xu,  
336 C. Yu, J. Li, Q. Zhou, W. Chen, A neutralizing human antibody binds to the N-terminal  
337 domain of the Spike protein of SARS-CoV-2. *Science* (2020).

- 338 21. P. J. Klasse, J. P. Moore, Antibodies to SARS-CoV-2 and their potential for therapeutic  
339 passive immunization. *Elife* **9**:e57877, (2020).
- 340 22. C. Kreer, M. Zehner, T. Weber, M. S. Ercanoglu, L. Gieselmann, C. Rohde, S. Halwe, M.  
341 Korenkov, P. Schommers, K. Vanshylla, V. Di Cristanziano, H. Janicki, R. Brinker, A.  
342 Ashurov, V. Krahling, A. Kupke, H. Cohen-Dvashi, M. Koch, J. M. Eckert, S. Lederer, N.  
343 Pfeifer, T. Wolf, M. Vehreschild, C. Wendtner, R. Diskin, H. Gruell, S. Becker, F. Klein,  
344 Longitudinal Isolation of Potent Near-Germline SARS-CoV-2-Neutralizing Antibodies  
345 from COVID-19 Patients. *Cell* S0092-8674(20) 30821-30827 (2020).
- 346 23. S. J. Zost, P. Gilchuk, J. B. Case, E. Binshtein, R. E. Chen, J. P. Nkolola, A. Schafer, J. X.  
347 Reidy, A. Trivette, R. S. Nargi, R. E. Sutton, N. Suryadevara, D. R. Martinez, L. E.  
348 Williamson, E. C. Chen, T. Jones, S. Day, L. Myers, A. O. Hassan, N. M. Kafai, E. S.  
349 Winkler, J. M. Fox, S. Shrihari, B. K. Mueller, J. Meiler, A. Chandrashekar, N. B. Mercado,  
350 J. J. Steinhardt, K. Ren, Y. M. Loo, N. L. Kallewaard, B. T. McCune, S. P. Keeler, M. J.  
351 Holtzman, D. H. Barouch, L. E. Gralinski, R. S. Baric, L. B. Thackray, M. S. Diamond, R.  
352 H. Carnahan, J. E. Crowe, Jr., Potently neutralizing and protective human antibodies  
353 against SARS-CoV-2. *Nature* (2020).
- 354 24. Y. Wu, F. Wang, C. Shen, W. Peng, D. Li, C. Zhao, Z. Li, S. Li, Y. Bi, Y. Yang, Y. Gong,  
355 H. Xiao, Z. Fan, S. Tan, G. Wu, W. Tan, X. Lu, C. Fan, Q. Wang, Y. Liu, C. Zhang, J. Qi,  
356 G. F. Gao, F. Gao, L. Liu, A noncompeting pair of human neutralizing antibodies block  
357 COVID-19 virus binding to its receptor ACE2. *Science* **368**, 1274-1278 (2020).
- 358 25. C. Wang, W. Li, D. Drabek, N. M. A. Okba, R. van Haperen, A. Osterhaus, F. J. M. van  
359 Kuppeveld, B. L. Haagmans, F. Grosveld, B. J. Bosch, A human monoclonal antibody  
360 blocking SARS-CoV-2 infection. *Nat. Commun.* **11**, 2251 (2020).



- 361 26. B. Ju, Q. Zhang, J. Ge, R. Wang, J. Sun, X. Ge, J. Yu, S. Shan, B. Zhou, S. Song, X. Tang,  
362 J. Yu, J. Lan, J. Yuan, H. Wang, J. Zhao, S. Zhang, Y. Wang, X. Shi, L. Liu, J. Zhao, X.  
363 Wang, Z. Zhang, L. Zhang, Human neutralizing antibodies elicited by SARS-CoV-2  
364 infection. *Nature* **584**,115-119 (2020).
- 365 27. Y. Cao, B. Su, X. Guo, W. Sun, Y. Deng, L. Bao, Q. Zhu, X. Zhang, Y. Zheng, C. Geng,  
366 X. Chai, R. He, X. Li, Q. Lv, H. Zhu, W. Deng, Y. Xu, Y. Wang, L. Qiao, Y. Tan, L. Song,  
367 G. Wang, X. Du, N. Gao, J. Liu, J. Xiao, X. D. Su, Z. Du, Y. Feng, C. Qin, C. Qin, R. Jin,  
368 X. S. Xie, Potent Neutralizing Antibodies against SARS-CoV-2 Identified by High-  
369 Throughput Single-Cell Sequencing of Convalescent Patients' B Cells. *Cell* **182**, 73-84  
370 (2020).
- 371 28. H. X. Liao, M. C. Levesque, A. Nagel, A. Dixon, R. J. Zhang, E. Walter, R. Parks, J.  
372 Whitesides, D. J. Marshall, K. K. Hwang, Y. Yang, X. Chen, F. Gao, S. Munshaw, T. B.  
373 Kepler, T. Denny, M. A. Moody, B. F. Haynes, High-throughput isolation of  
374 immunoglobulin genes from single human B cells and expression as monoclonal antibodies.  
375 *J. Virol. Methods* **158**, 171-179 (2009).
- 376 29. R. C. Duncan, F. Bergstrom, T. H. Coetzer, A. M. Blom, L. C. Wijeyewickrema, R. N.  
377 Pike, Multiple domains of MASP-2, an initiating complement protease, are required for  
378 interaction with its substrate C4. *Mol. Immunol.* **49**, 593-600 (2012).
- 379 30. K. Stettler, M. Beltramello, D. A. Espinosa, V. Graham, A. Cassotta, S. Bianchi, F.  
380 Vanzetta, A. Minola, S. Jaconi, F. Mele, M. Foglierini, M. Pedotti, L. Simonelli, S. Dowall,  
381 B. Atkinson, E. Percivalle, C. P. Simmons, L. Varani, J. Blum, F. Baldanti, E. Cameroni,  
382 R. Hewson, E. Harris, A. Lanzavecchia, F. Sallusto, D. Corti, Specificity, cross-reactivity,  
383 and function of antibodies elicited by Zika virus infection. *Science* **353**, 823-826 (2016).

- 384 31. L. Yu, R. Wang, F. Gao, M. Li, J. Liu, J. Wang, W. Hong, L. Zhao, Y. Wen, C. Yin, H.  
385 Wang, Q. Zhang, Y. Li, P. Zhou, R. Zhang, Y. Liu, X. Tang, Y. Guan, C. F. Qin, L. Chen,  
386 X. Shi, X. Jin, G. Cheng, F. Zhang, L. Zhang, Delineating antibody recognition against  
387 Zika virus during natural infection. *JCI Insight* **2** (12):e9302 (2017).
- 388 32. P. F. Zipfel, C. Skerka, Complement regulators and inhibitory proteins. *Nat. Rev. Immunol.*  
389 **9**, 729-740 (2009).
- 390 33. M. W. Lo, C. Kemper, T. M. Woodruff, COVID-19: Complement, Coagulation, and  
391 Collateral Damage. *J. Immunol.* (2020).
- 392 34. J. L. Liu, C. Cao, Q. J. Ma, Study on interaction between SARS-CoV N and MAP19. *Xi*  
393 *bao yu fen zi mian yi xue za zhi = Chinese journal of cellular and molecular immunology*  
394 **25**, 777-779 (2009).

395

396 **Acknowledgments:** We thank the staffs of the BL18U/19U/17U beamlines at SSRF for their help  
397 with the X-ray diffraction data screening and collections. We thank Junlang Liang, Tong Liu, Nan  
398 Li, Xiaoli Wang, Zhenxing Jia, and Jiaqi Li from Zhuhai Trinomab Biotechnology Co., Ltd. for  
399 technical assistants of mAbs isolation, production and characterization. **Funding:** COVID-19  
400 Emerging Prevention Products, Research Special Fund of Zhuhai City (ZH22036302200016PWC  
401 to S.C.; ZH22036302200028PWC to F. X.; ZH22046301200011PWC to H-X. L.); Emergency  
402 Fund from Key Realm R&D Program of Guangdong Province (2020B111113001) to H.S.; Zhuhai  
403 Innovative and Entrepreneurial Research Team Program (ZH01110405160015PWC,  
404 ZH01110405180040PWC) to H-X. L.; **Author contributions:** S. C., H. S., F. X. and H-X. L.  
405 contributed the conception of the study and established the construction of the article. S. C. and  
406 H-X. L. designed the experiments and wrote the manuscript. S. K., M. Y., S. H. contributed to  
407 protein purification and crystallization, in vitro protein-protein interaction analysis, and  
408 complement activation analysis. Y. W. contributed to mAbs isolation, in vitro protein-protein  
409 interaction analysis. S. C., S. K. M. Y., and S. H. performed structural determination and validation.  
410 S. C., S. K., Y. W. drew figures. X. C., Y. C., Q. C., Z. Z., Z. Z., Z. H., X. H., H. S., W. Z., and H.  
411 H. contributed to interpretation of data. Z. H., J. L., G. J., and F. X. contributed to clinical samples  
412 collections. S.K., M.Y., S. H., Y.W. contributed equally to this work.

413 **Competing interests:** The authors declare no conflict of interest.

414 **Data and materials availability:** The structure in this paper is deposited to the Protein Data Bank  
415 with 7CR5 access code.

416  
417

418

## Figures

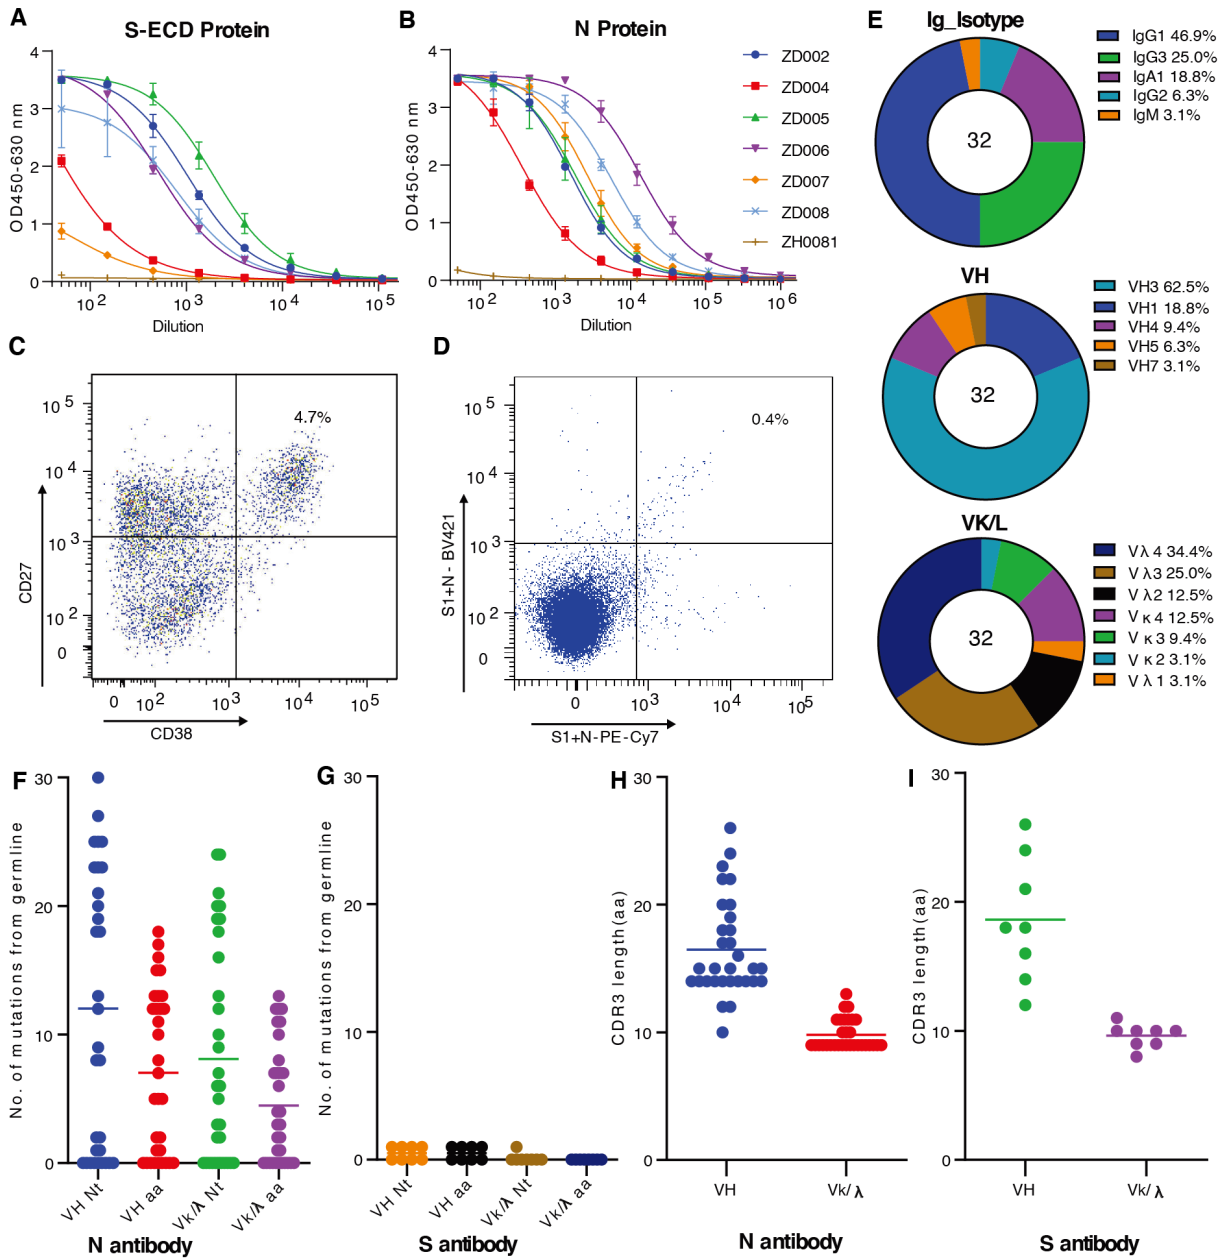

419

420 **Fig. 1. Antibodies acquisition and their characterization.** Serum of antibody titers of six SARS-  
 421 COV-2 convalescent patients to SARS-COV2 S (A) and N (B) proteins measured by ELISA.  
 422 Sorting of single plasma cells (C) with CD38 and CD27 double positive B cells and single N and  
 423 S protein-specific memory B cells (D) by FACS. (E) Percentage of different isotypes, VH and VL

424 gene families of 32 isolated N-reactive antibodies. **(F)** Number of mutations in nucleotides and  
425 amino acids in VH and VL ( $V_{\kappa}$  and  $V_{\lambda}$ ) of 32 N-reactive antibodies and eight S-reactive  
426 antibodies(G). H-CDR3 length of the 32 N-reactive antibodies **(H)** and eight S-reactive antibodies  
427 **(I)**.

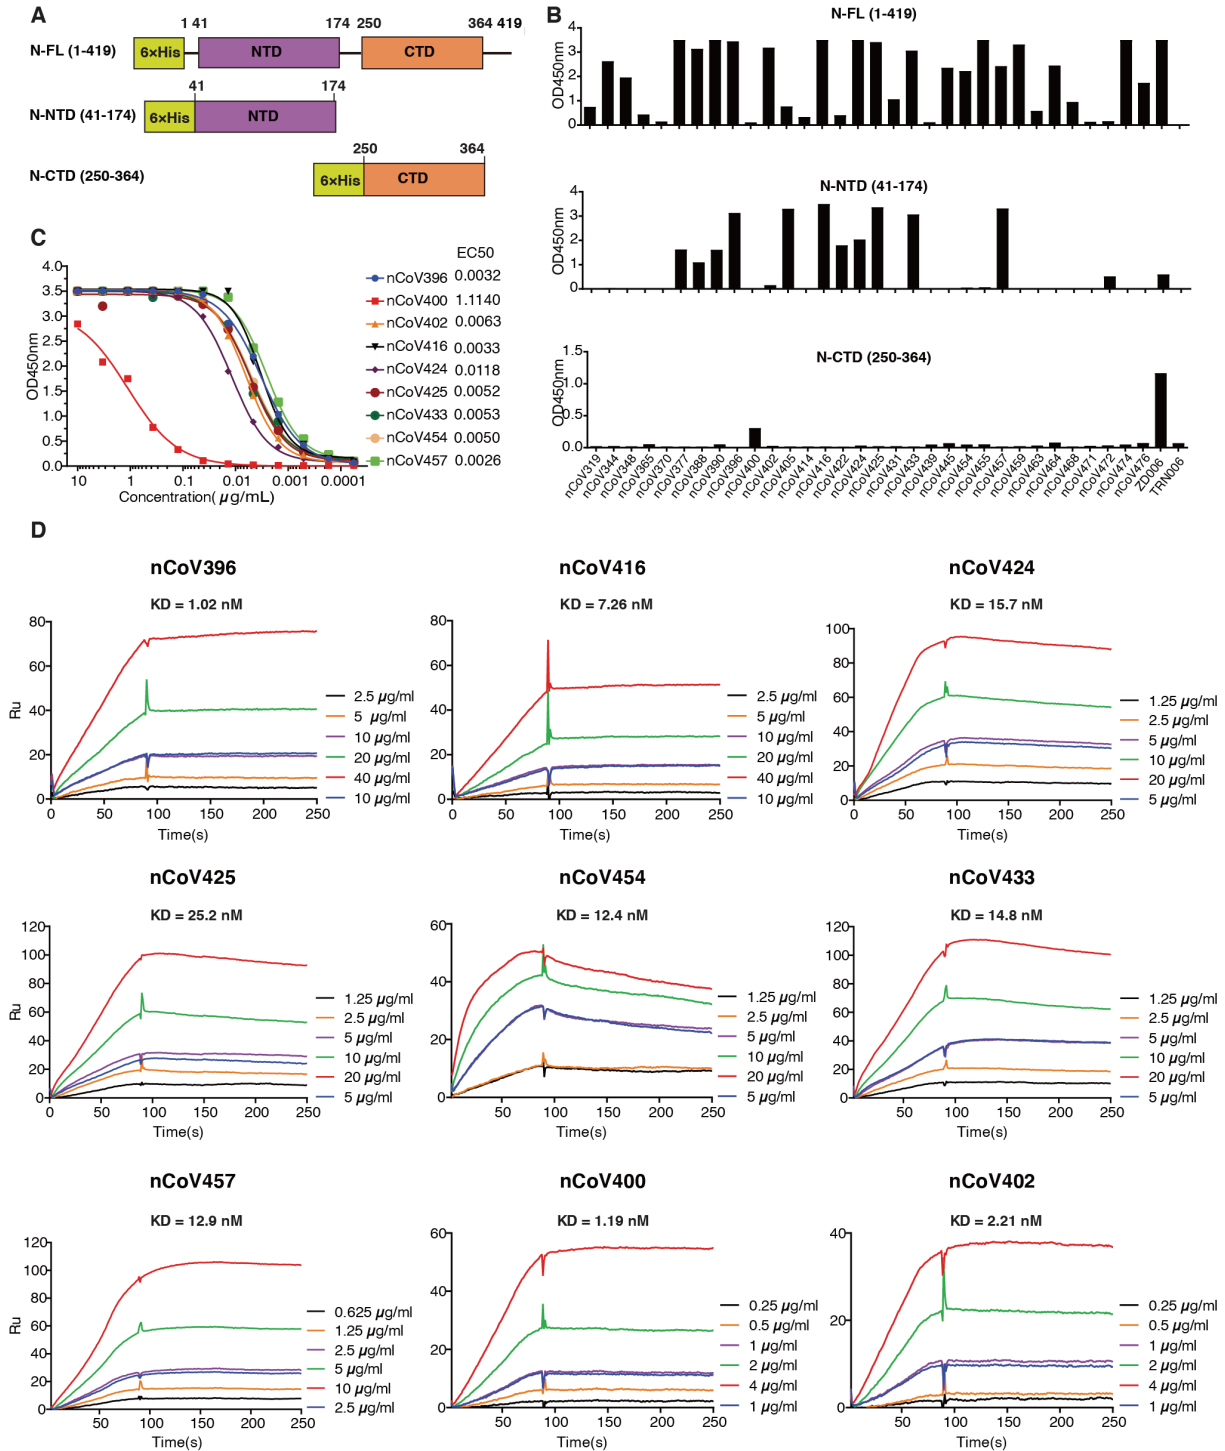

428

429

430

431

**Fig. 2. Reactivity and affinity of the isolated antibodies to the N protein antigens. (A)** Schematic presentation of SARS-CoV2 N protein and two variant forms. **(B)** Antibodies expressed in 293 cells transfected were evaluated for binding to the N-FL, N-NTD and N-CTD by

432 ELISA. Plasma from the patient ZD006 and an irrelevant mAb TRN006 were used as positive  
433 control and negative control, respectively. (C) Ability of nine purified antibodies to the N-FL  
434 protein was determined by ELISA. (D) Binding affinity of nine selected antibodies to N protein  
435 were measured by SPR. KD were shown above the individual plots.

436

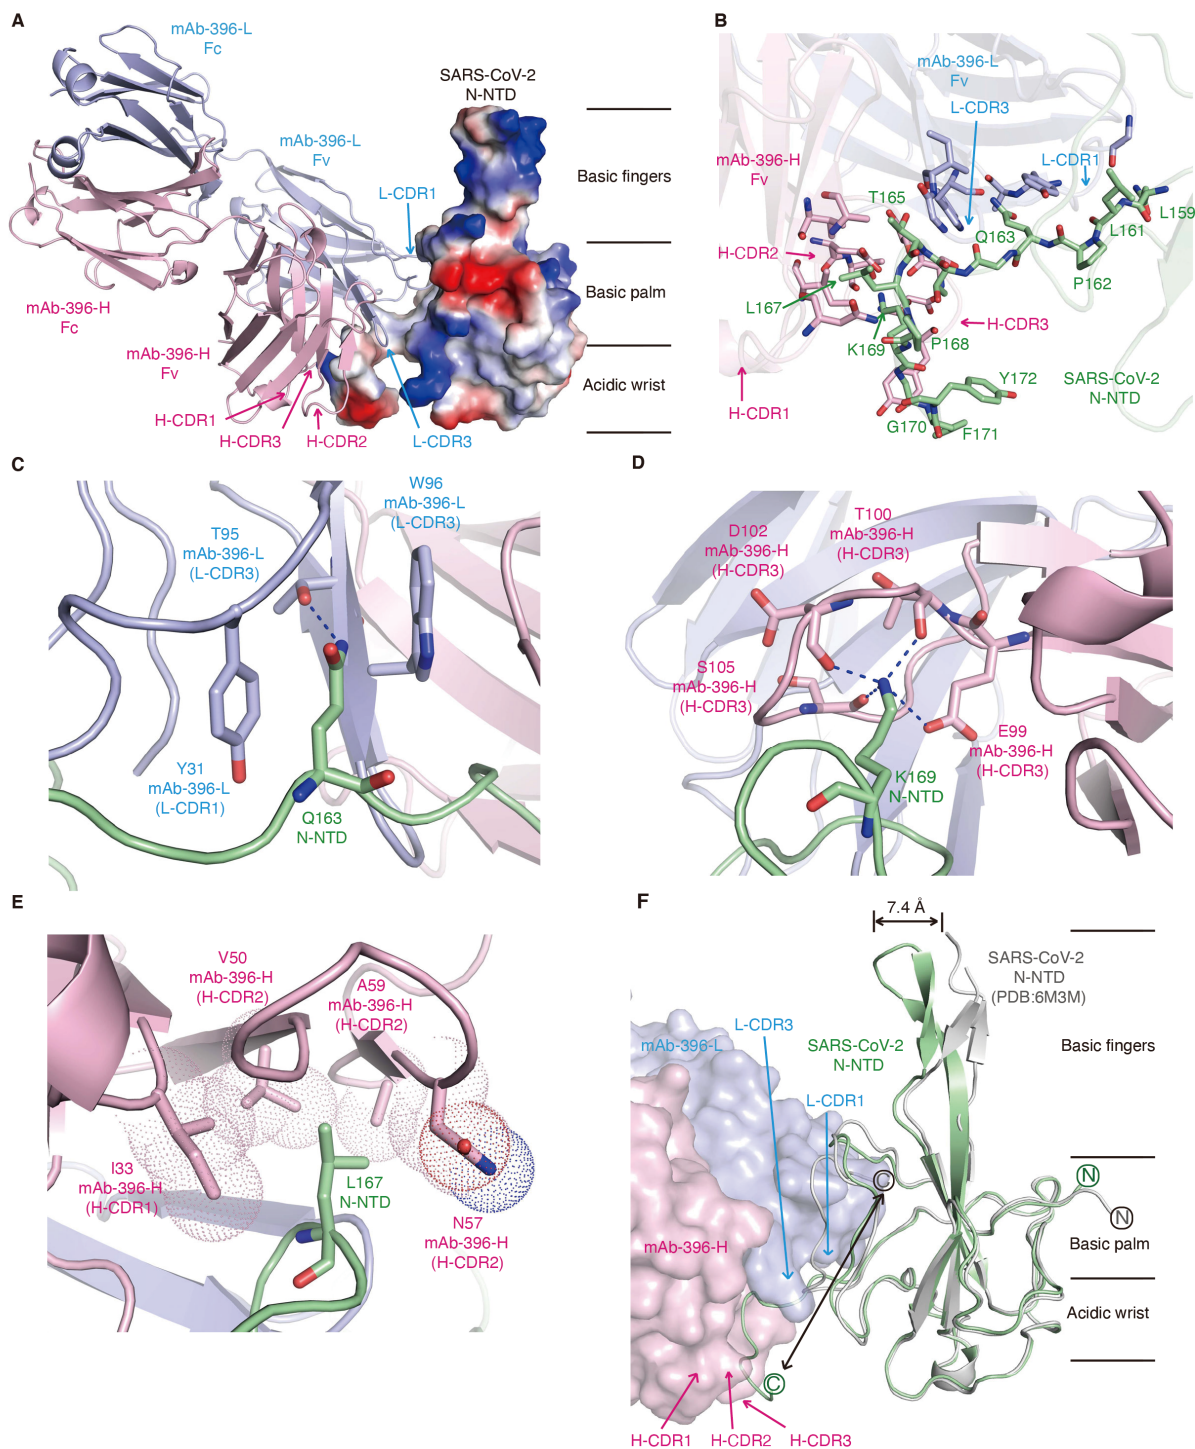

437

438

439

**Fig. 3. Complex structure of mAb nCoV396 with SARS-CoV-2 N-NTD.** (A) Overall structure of the mAb nCoV396 - SARS-CoV-2 N-NTD complex. The light chain (pink) and heavy chain



440 (blue) of mAb nCoV396 are illustrated with ribbon representation. SARS-CoV-2 N-NTD is  
441 illustrated with electrostatics surface, in which blue denotes positive charge potential while red  
442 indicates negative charge potential. **(B)** The N-NTD epitope recognized by mAb nCoV396. The  
443 interacting residues of N-NTD and nCoV396 is highlighted with stick representation. Recognition  
444 of Q163 **(C)**, K169**(D)** and L167 **(E)** in N-NTD by mAb nCoV396. Dash blue line represents  
445 hydrogen bond. Hydrophobic interactions are illustrated with dot representation. **(F)**  
446 Conformational changes of N-NTD upon the mAb nCoV396 binding. Apo structure of N-NTD is  
447 colored with grey. Antibody bound N-NTD is colored with green. N-terminal and C-terminal of  
448 the N-NTD is labeled with circle characters. mAb nCoV396 is illustrated with surface  
449 representation. All figures were prepared by Pymol.

450

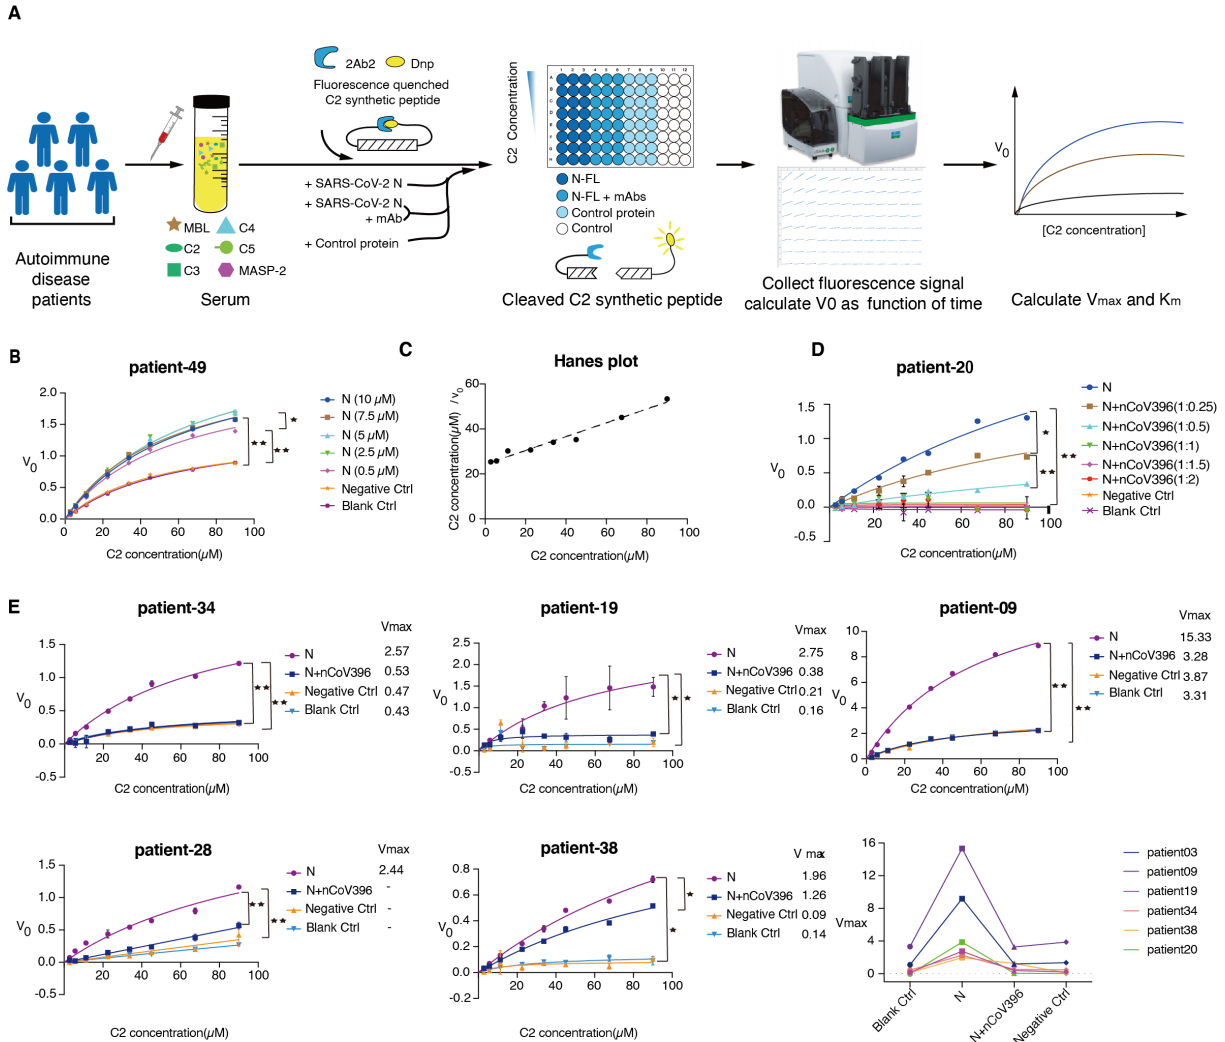

451

452

453

454

455

456

457

458

459

**Fig. 4. Antibody nCoV396 compromise SARS-CoV-2 N protein induced complement hyper-activation.** (A) Flow scheme of SARS-CoV-2 N protein and nCoV396 influence the protease activity of MASP-2 in serum of autoimmune disease patients. The Michaelis-Menten curve shows the effect of increasing N protein concentration (B) and antibody concentration (D) on the substrate C2 cleavage of MASP2 in serum of patient-49 and patient-20. (C) A Hanes plot where C2 concentration/ $V_0$  is plotted against C2 concentration of adding 5  $\mu$ M N protein. (E) MAb nCoV396 inhibits N protein induced excessive cleavage of C2 in serum of six autoimmune disease patients and last panel shows a summary of  $V_{max}$  for all patients. Negative control (Negative Ctrl) and

460 blank control (Blank Ctrl) represent reactions containing BSA instead of N or N and mAb, and  
461 without exogenous protein, respectively. The mean values and SDs of three technical replicates  
462 are shown. P values: \*P < 0.05; \*\*P < 0.01; “-” means that the kinetics did not conform to  
463 Michaelis-Menten kinetics.
